# Supplementary material for: Impact of an electronic medication management system on hospital doctors’ and nurses’ work: a controlled pre–post, time and motion study
Source: PubMed Central journal article supplement — J Am Med Inform Assoc. 2013 May 28;20(6):1150–8. doi: 10.1136/amiajnl-2012-001414 (PMC3822109; doi:10.1136/amiajnl-2012-001414), 2013-05-28
Supplement: amiajnl-2012-001414-s1.pdf [file amiajnl-2012-001414-s1.pdf]

## Appendix 1 Definitions of direct care, medication-related tasks and professional communication

| <b>Direct care</b><br>Any activity directly related to patient care                                                                                                                                                                                                                                                                                                                                                                                                                                                                                                                                                                  |                                                                                                                                                                                                                                                                                                                                                                                                                                                                               |
|--------------------------------------------------------------------------------------------------------------------------------------------------------------------------------------------------------------------------------------------------------------------------------------------------------------------------------------------------------------------------------------------------------------------------------------------------------------------------------------------------------------------------------------------------------------------------------------------------------------------------------------|-------------------------------------------------------------------------------------------------------------------------------------------------------------------------------------------------------------------------------------------------------------------------------------------------------------------------------------------------------------------------------------------------------------------------------------------------------------------------------|
| <b>Includes</b>                                                                                                                                                                                                                                                                                                                                                                                                                                                                                                                                                                                                                      | <b>Excludes</b>                                                                                                                                                                                                                                                                                                                                                                                                                                                               |
| <p>Doctors:</p> <ul style="list-style-type: none"> <li>• Admitting a patient</li> <li>• Examining/reviewing a patient</li> <li>• Performing medical procedures</li> <li>• Assisting other staff with procedure</li> <li>• Escorting a patient</li> <li>• Communicating with patient or relative</li> <li>• Taking a history</li> </ul> <p>Nurses:</p> <ul style="list-style-type: none"> <li>• Bathing</li> <li>• Nursing procedures eg catheterisation</li> <li>• Assisting doctor with procedure</li> <li>• Making pt comfortable</li> <li>• Transporting pt</li> <li>• Communicating with pt/rel</li> <li>• Bed-making</li> </ul> | <ul style="list-style-type: none"> <li>• Medication related activities</li> <li>• Documenting</li> <li>• Reviewing documentation or results</li> <li>• Planning care</li> <li>• Communicating with staff member</li> </ul> <p>Note: All communication with patient/relative is defined as direct care</p> <p>When a doctor or nurse is discussing medications with a patient (eg. as part of history taking and review), this is defined as a medication related activity</p> |

| <b>Professional Communication</b><br>Any work-related discussion with another staff member                                                                                                               |                                                                                        |
|----------------------------------------------------------------------------------------------------------------------------------------------------------------------------------------------------------|----------------------------------------------------------------------------------------|
| <b>Includes</b>                                                                                                                                                                                          | <b>Excludes</b>                                                                        |
| <ul style="list-style-type: none"> <li>• Requesting medical or nursing consultation or review</li> <li>• Planning care with any health professional</li> <li>• Handover/parts of a ward round</li> </ul> | <p>Medication related discussion with patient or relative</p> <p>Social discussion</p> |

|                                                                                                                                                                                                                                                                                                                                                                                                                                                                                                                                                                                                                                                                           |                                                                                                                                        |
|---------------------------------------------------------------------------------------------------------------------------------------------------------------------------------------------------------------------------------------------------------------------------------------------------------------------------------------------------------------------------------------------------------------------------------------------------------------------------------------------------------------------------------------------------------------------------------------------------------------------------------------------------------------------------|----------------------------------------------------------------------------------------------------------------------------------------|
| <b>Medication-Related Tasks</b>                                                                                                                                                                                                                                                                                                                                                                                                                                                                                                                                                                                                                                           |                                                                                                                                        |
| Any activity that relates to medication for a particular patient                                                                                                                                                                                                                                                                                                                                                                                                                                                                                                                                                                                                          |                                                                                                                                        |
| <b>Find Order</b>                                                                                                                                                                                                                                                                                                                                                                                                                                                                                                                                                                                                                                                         |                                                                                                                                        |
| <b>Includes</b>                                                                                                                                                                                                                                                                                                                                                                                                                                                                                                                                                                                                                                                           | <b>Excludes</b>                                                                                                                        |
| looking for medication charts/medical records with drug order                                                                                                                                                                                                                                                                                                                                                                                                                                                                                                                                                                                                             | Looking for notes in general                                                                                                           |
| <b>Prescribe Drug</b>                                                                                                                                                                                                                                                                                                                                                                                                                                                                                                                                                                                                                                                     |                                                                                                                                        |
| <b>Includes</b>                                                                                                                                                                                                                                                                                                                                                                                                                                                                                                                                                                                                                                                           | <b>Excludes</b>                                                                                                                        |
| Writing a new order<br>Changing orders<br>Giving a verbal order<br>Writing discharge scripts<br>Obtaining drug authority numbers                                                                                                                                                                                                                                                                                                                                                                                                                                                                                                                                          | Re-writing orders (eg re-writing due to legibility issues, requires signature etc) following a request for clarification (see clarify) |
| <b>Transcribe Order</b>                                                                                                                                                                                                                                                                                                                                                                                                                                                                                                                                                                                                                                                   |                                                                                                                                        |
| <b>Includes</b>                                                                                                                                                                                                                                                                                                                                                                                                                                                                                                                                                                                                                                                           | <b>Excludes</b>                                                                                                                        |
| Copying medication orders from one medication chart to a new medication chart                                                                                                                                                                                                                                                                                                                                                                                                                                                                                                                                                                                             | Re-writing orders (eg re-writing due to legibility issues, requires signature etc) following a request for clarification (see clarify) |
| <b>Preparing drug</b>                                                                                                                                                                                                                                                                                                                                                                                                                                                                                                                                                                                                                                                     |                                                                                                                                        |
| Activity around drug preparation & clean-up                                                                                                                                                                                                                                                                                                                                                                                                                                                                                                                                                                                                                               |                                                                                                                                        |
| <b>Includes</b>                                                                                                                                                                                                                                                                                                                                                                                                                                                                                                                                                                                                                                                           | <b>Excludes</b>                                                                                                                        |
| Finding drug or reconstitution fluid or Selection of appropriate equipment for preparation and administration<br>Locating drug keys<br>Preparing the drug eg reconstitution, drawing up solution, crushing tablets, preparing nebulizers<br>Commencement and removal of IV infusions, cannulation, rearranging and disconnecting tubing for the purpose of drug administration<br>Returning/disposing equipment &/or drug following administration<br>Dangerous drugs (eg narcotics) counting & drug register entry for individual patients<br>Checking the drug with other staff (when the doctor/nurse who is being observed is the clinician responsible for the drug) |                                                                                                                                        |

|                                                                                                                                                                                                                                                                                                                                                                                                                                                                                                                                                                                        |                                                                                                                                              |
|----------------------------------------------------------------------------------------------------------------------------------------------------------------------------------------------------------------------------------------------------------------------------------------------------------------------------------------------------------------------------------------------------------------------------------------------------------------------------------------------------------------------------------------------------------------------------------------|----------------------------------------------------------------------------------------------------------------------------------------------|
| <p><b>Clarify</b><br/>Action taken when:</p> <ul style="list-style-type: none"> <li>asked to clarify an order that has been previously written, OR</li> <li>asking another doctor to clarify an order, OR</li> <li>seeking drug information for clarification (e.g. when prescribing)</li> </ul>                                                                                                                                                                                                                                                                                       |                                                                                                                                              |
| <p><b>Includes</b></p> <ul style="list-style-type: none"> <li>Re-writing a drug order due to illegibility or legal reasons</li> <li>Checking the particular drug details in drug information source</li> <li>Asking another health professional about the drug order</li> <li>Clarifying with the patient about the drug order</li> </ul>                                                                                                                                                                                                                                              | <p><b>Excludes</b></p> <p>Discussion around a drug choice or dosage (see medication discussion)</p>                                          |
| <p><b>Check drug</b><br/>Checking with &amp; co-signing of a nurse's or another doctor's medication</p>                                                                                                                                                                                                                                                                                                                                                                                                                                                                                |                                                                                                                                              |
| <p><b>Includes</b></p> <ul style="list-style-type: none"> <li>Requests for dangerous drug (eg narcotics) drug checks for individual patients</li> <li>Witnessing any other medication for another health professional, eg IV</li> </ul>                                                                                                                                                                                                                                                                                                                                                | <p><b>Excludes</b></p> <p>Asking another nurse or doctor to check a drug that the observed doctor/nurse wants to give (see prep drug)</p>    |
| <p><b>Administering a drug and recording drug administration</b><br/>Administering drug to patient</p>                                                                                                                                                                                                                                                                                                                                                                                                                                                                                 |                                                                                                                                              |
| <p><b>Includes</b></p> <ul style="list-style-type: none"> <li>Checking patient identification band &amp;/or order &amp;/or drug label</li> <li>Any patient preparation, eg sitting patient up so they can swallow medication</li> <li>Reviewing &amp;/or taking &amp;/or documenting vital signs as part of the protocol before giving the medication (eg pulse prior to digoxin)</li> <li>Checking &amp;/or adjusting IV admin throughout the process, eg returning to the patient &amp; checking tubing, drip rate etc.</li> <li>Documenting on medication order in notes</li> </ul> | <p><b>Excludes</b></p> <p>Co-signing (see check drug)<br/>Drug register (see prep drug or check drug)</p>                                    |
| <p><b>Discuss medication</b><br/>Talking about a drug with another health professional &amp;/or patient/relative</p>                                                                                                                                                                                                                                                                                                                                                                                                                                                                   |                                                                                                                                              |
| <p><b>Includes</b></p> <ul style="list-style-type: none"> <li>Clarify choice of drug or dosage or side effects</li> <li>Discharge education</li> <li>Discuss efficacy</li> <li>Discuss administration protocols</li> </ul>                                                                                                                                                                                                                                                                                                                                                             | <p><b>Excludes</b></p> <p>Clarification of an order (see clarify)<br/>Requests for re-writing of order due to illegibility (see clarify)</p> |
| <p><b>Review</b><br/>Looking over drug orders as part of planning care</p>                                                                                                                                                                                                                                                                                                                                                                                                                                                                                                             |                                                                                                                                              |
